# Supplementary material for: Multi-functional scaling methodology for translational pharmacokinetic and pharmacodynamic applications using integrated microphysiological systems (MPS)
Source: Royal Society of Chemistry journal article supplement (doi:10.1039/c6ib00243a), 2017-01-01
Supplement: c6ib00243a2.xlsx [file c6ib00243a2.xlsx]

## Sheet: Sheet1
	Platform I	Drug
			Volume of Distribution in vivo (l/kg)	F in vivo	F in vitro	D in vivo (mg)
	Training Set	diazepam	1	1	0.880019	10
		diclofenac	0.22	0.63	0.547738	50
		fenoprofen	0.1	0.85	0.766152	60
		ibuprofen	0.15	0.99	0.752925	600
		lidocaine	1.8	0.3	0.742549	500
		phenacetin	1.4	0.37	0.703158	1235
		propranolol	3.1	0.26	0.784516	80
		warfarin	0.13	1	0.985497	25
					0.770319
			Volume of Distribution in vivo (l/kg)	F in vivo	F in vitro	D in vivo (mg)
	Test Set	acetaminophen	1	0.63	0.816064	500
		clozapine	1.6	0.27	0.810614	100
		imipramine	14	0.42	0.714224	50
		oxazepam	0.59	0.93	0.919812	15
		sildenafil	1.4	0.41	0.81226	50
					0.814595
	Platform II	Drug
			Volume of Distribution in vivo (l/kg)	F in vivo	F in vitro	D in vivo (mg)
	Training Set	betaxolol	4.9	0.89	0.881603	20
		linezolid	0.87	1	0.97322	625
		pindolol	2.02857	0.87	0.879435	5
		prednisolone	0.86	0.75	0.650234	20
		quinidine	2.75	0.75	0.623907	400
		ranitidine	0.994286	0.6	0.719709	150
		theophylline	0.514286	0.96	0.9649	500
		timolol	3.08571	0.65	0.743746	5
					0.804594
	Test Set		Volume of Distribution in vivo (l/kg)	F in vivo	F in vitro	D in vivo (mg)
		acebutolol	1.7	0.27	0.588751	300
		alprazolam	0.8	0.88	0.99955	1
		ketoprofen	0.13	0.85	0.595509	50
		indomethacin	0.096	1	0.794736	50
		nadolol	1.9	0.34	0.713504	120
					0.73841
